# Supplementary material
Source: PubMed Central journal article supplement (PMC2575051)
Supplement: NIHMS58411-supplement-supplementary.pdf [file NIHMS58411-supplement-supplementary.pdf]

# Supplementary Material

Automated error-tolerant macromolecular structure determination  
from multidimensional nuclear Overhauser enhancement spectra  
and chemical shift assignments: Improved robustness and  
performance of the PASD algorithm

John J. Kuszewski, Robin Augustine Thottungal, G. Marius Clore, and  
Charles D. Schwieters

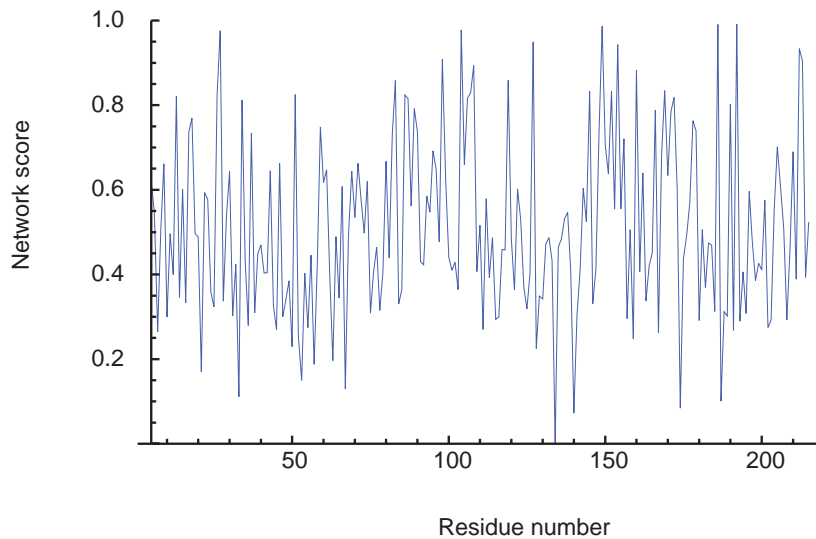

Figure 1: Intraresidue network residue pair scores  $R(a, a)$  (defined in Eq. 1) for ThTP as a function of residue number. These scores were calculated on the basis of the set of peak assignments generated by the two-step NOE peak matching algorithm (Section 2.1.2). It can be seen that there is large variation in  $R(a, a)$  along the sequence.

Table 1: Performance of Shift Correction Procedure<sup>a</sup>

| Spectrum        | shift assignments<br>with no target<br>(%) | shift assignments<br>with no consistent<br>target (%) | overall<br>score<br>(%) | Shift Correction (ppm) |               |                      |             |
|-----------------|--------------------------------------------|-------------------------------------------------------|-------------------------|------------------------|---------------|----------------------|-------------|
|                 |                                            |                                                       |                         | <sup>1</sup> H<br>from | heavy<br>from | <sup>1</sup> H<br>to | heavy<br>to |
| <b>CVN</b>      |                                            |                                                       |                         |                        |               |                      |             |
| 3dC             | 8                                          | 15                                                    | 48                      | 0.012                  | 0.137         | 0.012                |             |
| 3dN             | 25                                         | 64                                                    | 13                      | 0.016                  | 0.222         | 0.018                |             |
| <b>IL-4</b>     |                                            |                                                       |                         |                        |               |                      |             |
| 3dC             | 4                                          | 20                                                    | 44                      | 0.015                  | 0.129         | 0.015                |             |
| 3dN             | 39                                         | 56                                                    | 6                       | 0.014                  | 0.085         | 0.013                |             |
| 4dCC            | 48                                         | 45                                                    | 11                      | 0.034                  | 0.249         | 0.021                | 0.240       |
| <b>YmoA</b>     |                                            |                                                       |                         |                        |               |                      |             |
| 3dC             | 2                                          | 3                                                     | 74                      | 0.016                  | 0.158         | 0.015                |             |
| 3dN             | 43                                         | 47                                                    | 17                      | 0.010                  | 0.220         | 0.016                |             |
| 4dCC            | 6                                          | 20                                                    | 53                      | 0.013                  | 0.112         | 0.016                | 0.108       |
| 4dCN            | 41                                         | 6                                                     | 88                      | 0.022                  | 0.233         | 0.009                | 0.156       |
| <b>meth1743</b> |                                            |                                                       |                         |                        |               |                      |             |
| 3dC             | 34                                         | 31                                                    | 40                      | 0.016                  | 0.059         | 0.016                |             |
| 3dN             | 24                                         | 75                                                    | 1                       | 0.008                  | 0.040         | 0.005                |             |
| <b>NiRD</b>     |                                            |                                                       |                         |                        |               |                      |             |
| 3dC aliph.      | 41                                         | 35                                                    | 31                      | 0.013                  | 0.100         | 0.014                |             |
| 3dC arom.       | 86                                         | 9                                                     | 17                      | 0.008                  | 0.051         | 0.016                |             |
| 3dN             | 28                                         | 64                                                    | 12                      | 0.013                  | 0.116         | 0.024                |             |
| 4dCC            | 25                                         | 31                                                    | 36                      | 0.015                  | 0.131         | 0.014                | 0.114       |
| <b>ThTP</b>     |                                            |                                                       |                         |                        |               |                      |             |
| 3dC aliph.      | 6                                          | 21                                                    | 45                      | 0.014                  | 0.145         | 0.015                |             |
| 3dC arom.       | 91                                         | 3                                                     | 37                      | 0.007                  | 0.029         | 0.020                |             |
| 3dN             | 26                                         | 72                                                    | 3                       | 0.014                  | 0.224         | 0.011                |             |

<sup>a</sup> For each NOESY spectrum, the fraction of shift assignments without any possible targets is shown in the first column. The fraction of shift assignments for which there is no target consistent with the others is shown in the second column. The third column corresponds to the fraction of possible calibration peaks for which there are assignments. The last four columns give the standard deviation of the difference between the raw chemical shifts and the corrected chemical shifts for shift assignments along each dimension of the spectrum.

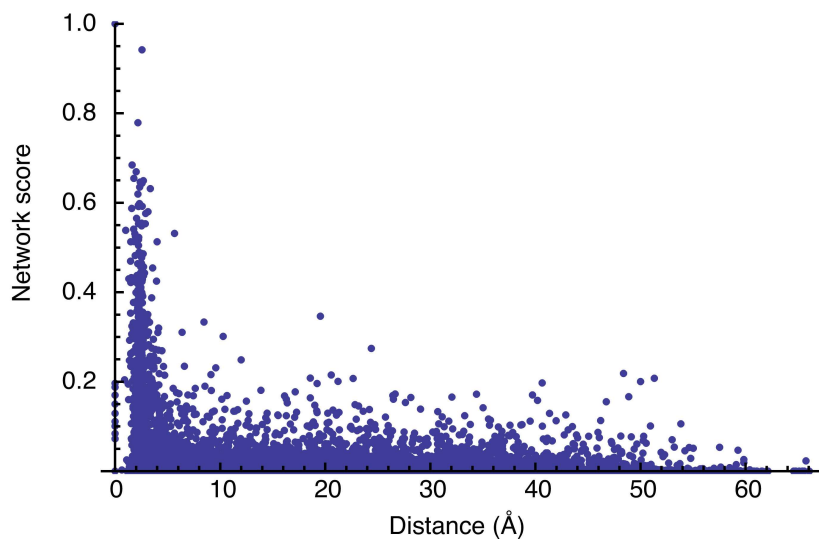

Figure 2: Normalized network residue pair scores  $R'(a, b)$  (defined in Eq. 2) for ThTP as a function of the distance in space between the residues in the reference structure.  $R'$  is calculated on the basis of the peak assignments generated by the two-step matching procedure (Section 2.1.2) using the NOE spectra of ThTP (Table 2), as described in Section 2.1.3. One can see that at the chosen cutoff value of  $R' = 0.2$ , a reasonable number of bad contacts are selected along with a large number of true contacts.

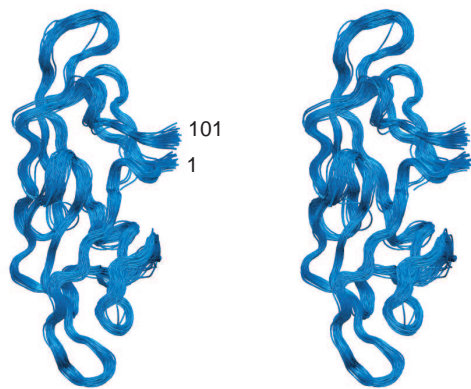

Figure 3: Ensemble of 50 structures of CVN resulting from the second structure calculation pass.

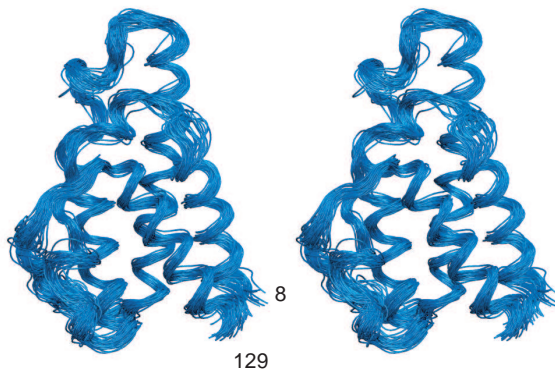

Figure 4: Ensemble of 50 structures of IL-4 resulting from the second structure calculation pass.

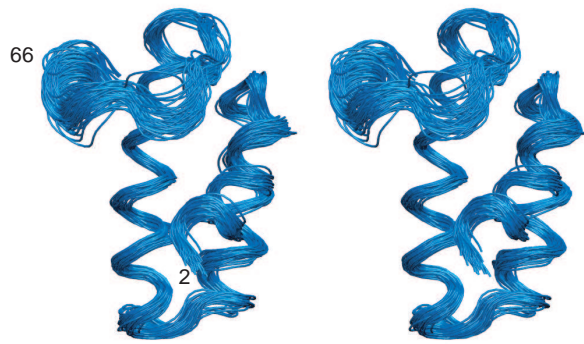

Figure 5: Ensemble of 50 structures of YmoA resulting from the second structure calculation pass.

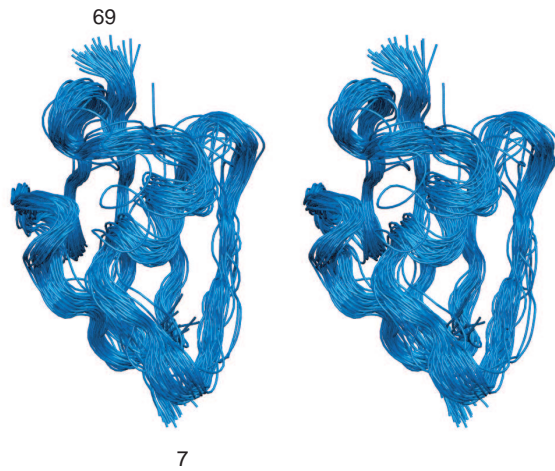

Figure 6: Ensemble of 50 structures of mth1743 resulting from the second structure calculation pass.

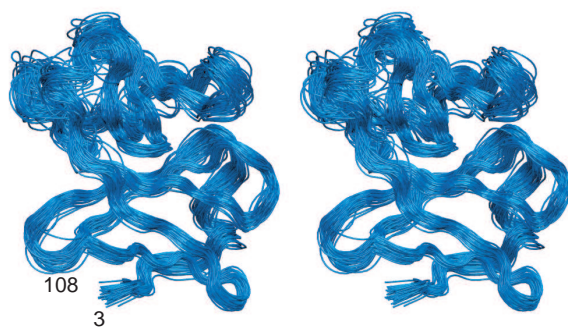

Figure 7: Ensemble of 50 structures of NiRD resulting from the second structure calculation pass.

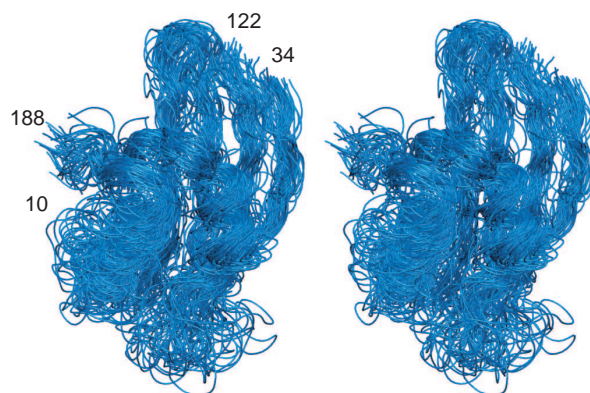

Figure 8: Ensemble of 50 structures of ThTp, domain 1 resulting from the second structure calculation pass.

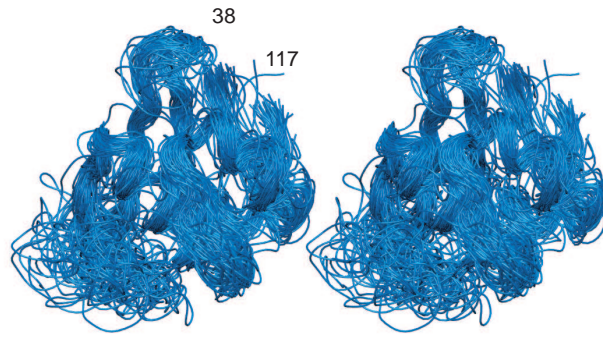

Figure 9: Ensemble of 50 structures of ThTp, domain 2 resulting from the second structure calculation pass.

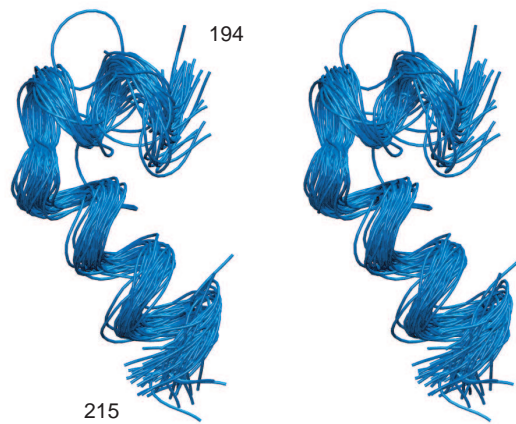

Figure 10: Ensemble of 50 structures of ThTP, domain 3 resulting from the second structure calculation pass.
